# Supplementary material for: Trace detection of homologues and isomers based on hollow mesoporous silica sphere photonic crystals
Source: Royal Society of Chemistry journal article supplement (doi:10.1039/c7mh00447h), 2017-01-01
Supplement: c7mh00447h2.pdf [file c7mh00447h2.pdf]

## Trace Detection of Homologues and Isomers Based on Hollow Mesoporous Silica Sphere Photonic Crystals

Chengjia Xiong, Jiupeng Zhao, Lebin Wang, Hongbin Geng, Hongbo Xu,\* and Yao Li\*

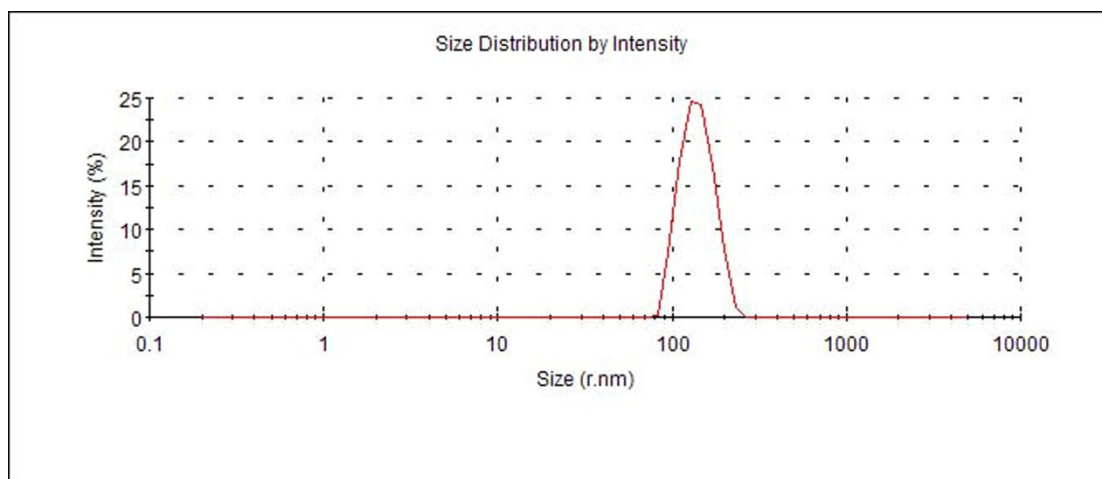

Fig.S1 Size distribution of the HMSSs-200/260.

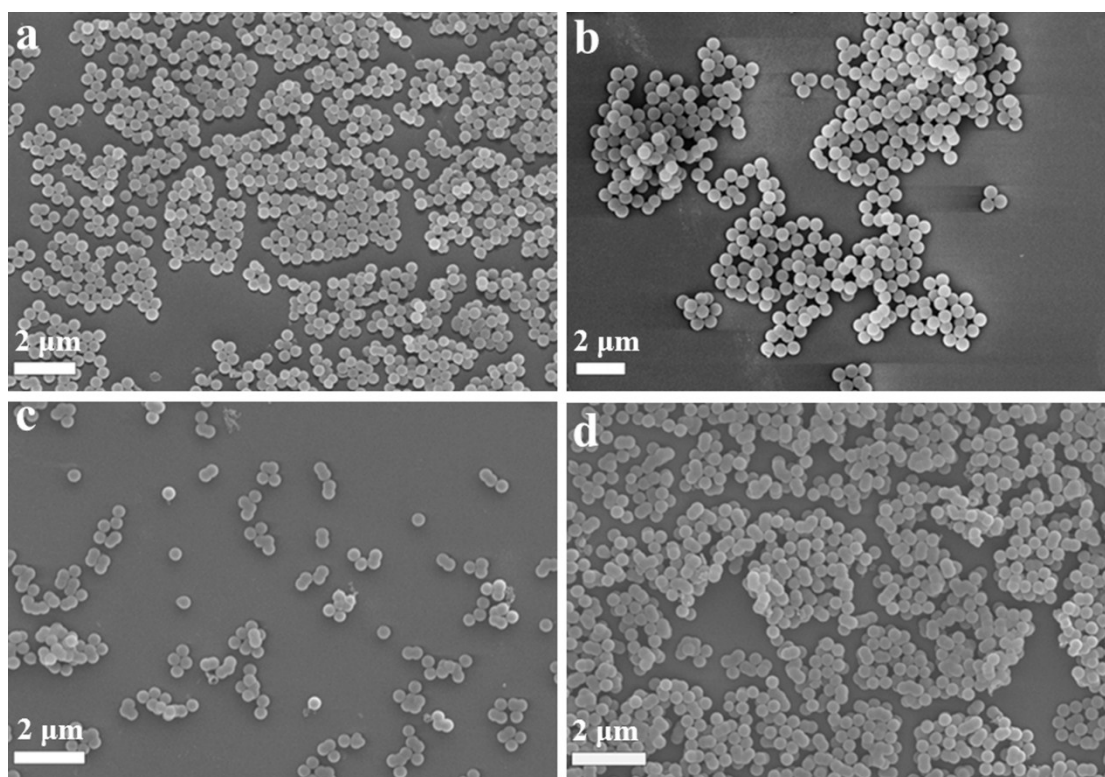

Fig. S2 SEM images of HMSSs with different inner and outer diameters: (a) HMSSs-265/360, (b) HMSSs-370/475, (c) HMSSs-200/300, and (d) HMSSs-200/330.

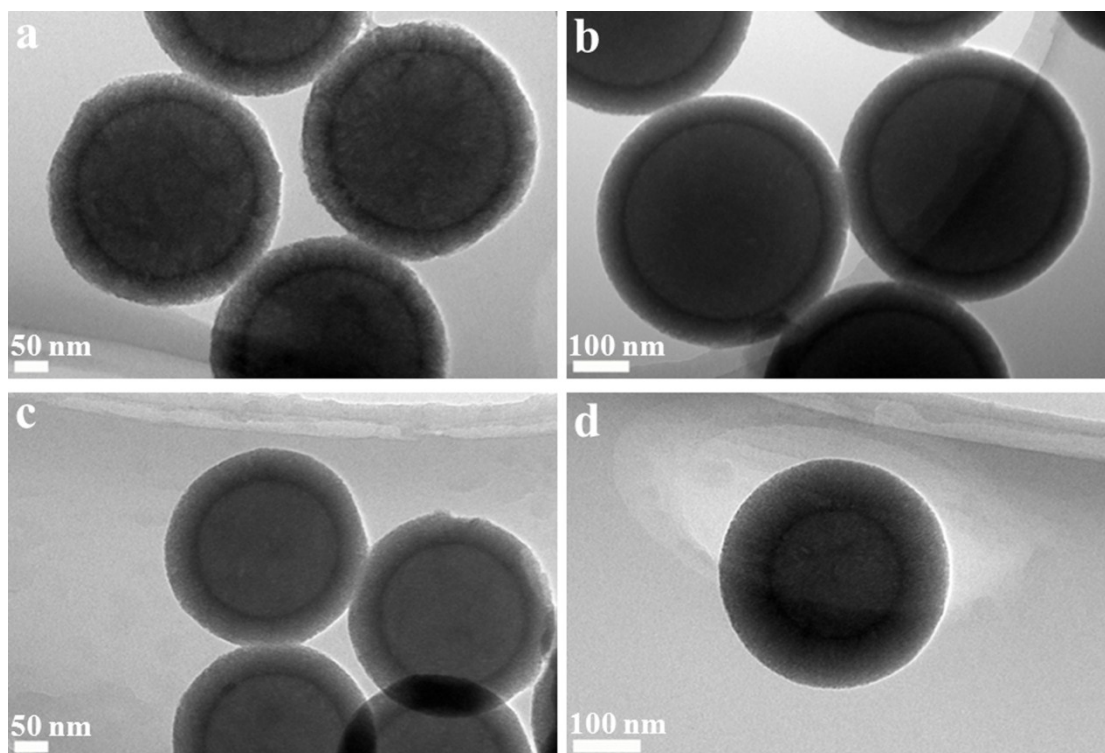

**Fig. S3** TEM images of HMSSs with different inner and outer diameters: (a) HMSSs-265/360, (b) HMSSs-370/475, (c) HMSSs-200/300, and (d) HMSSs-200/330.

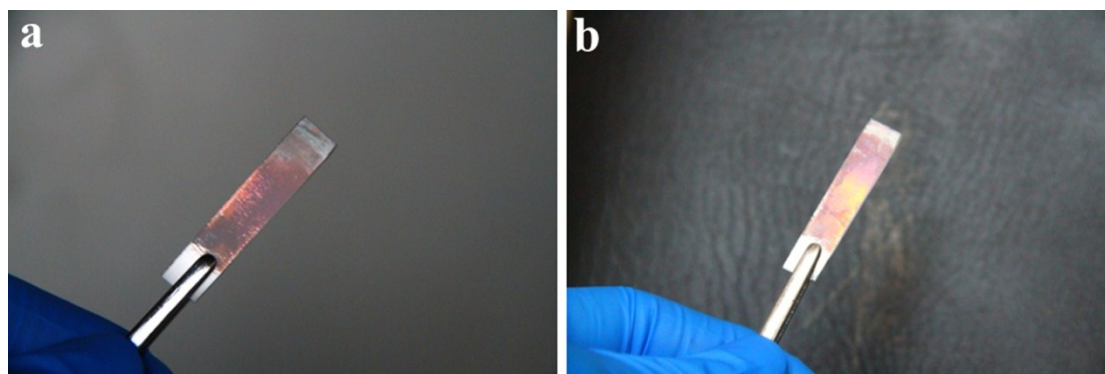

**Fig. S4** Optical photographs of the HMSSs-200/260 PC in (a) air and (b) ethanol.

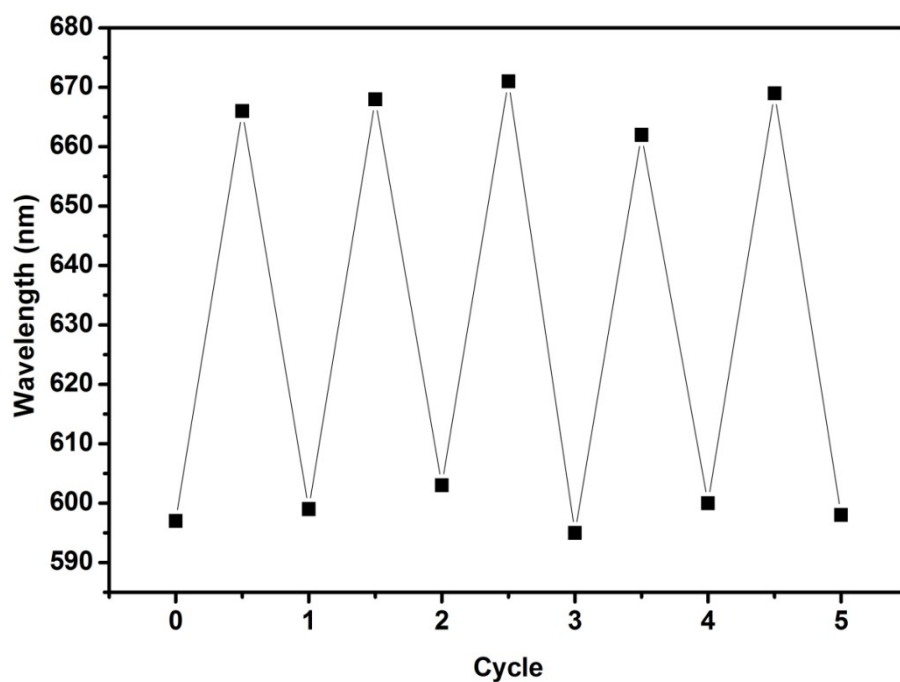

Fig. S5 Reversible stopband movements for the HMSSs-200/260 PC alternately infiltrated by air and ethanol.

Table S1 Refractive indices and stopband shifts of homologues or isomers.

| Chemicals       | $n$   | Stopband shift/nm |
|-----------------|-------|-------------------|
| Methanol        | 1.329 | 64                |
| Ethanol         | 1.362 | 105               |
| n-Propanol      | 1.385 | 145               |
| iso-Propanol    | 1.377 | 120               |
| n-Butanol       | 1.399 | 134               |
| iso-Butanol     | 1.398 | 141               |
| Benzene         | 1.501 | 173               |
| o-Xylene        | 1.505 | 190               |
| m-Xylene        | 1.495 | 165               |
| p-Xylene        | 1.497 | 158               |
| Ethanolamine    | 1.454 | 137               |
| Diethanolamine  | 1.476 | 148               |
| Triethanolamine | 1.482 | 156               |

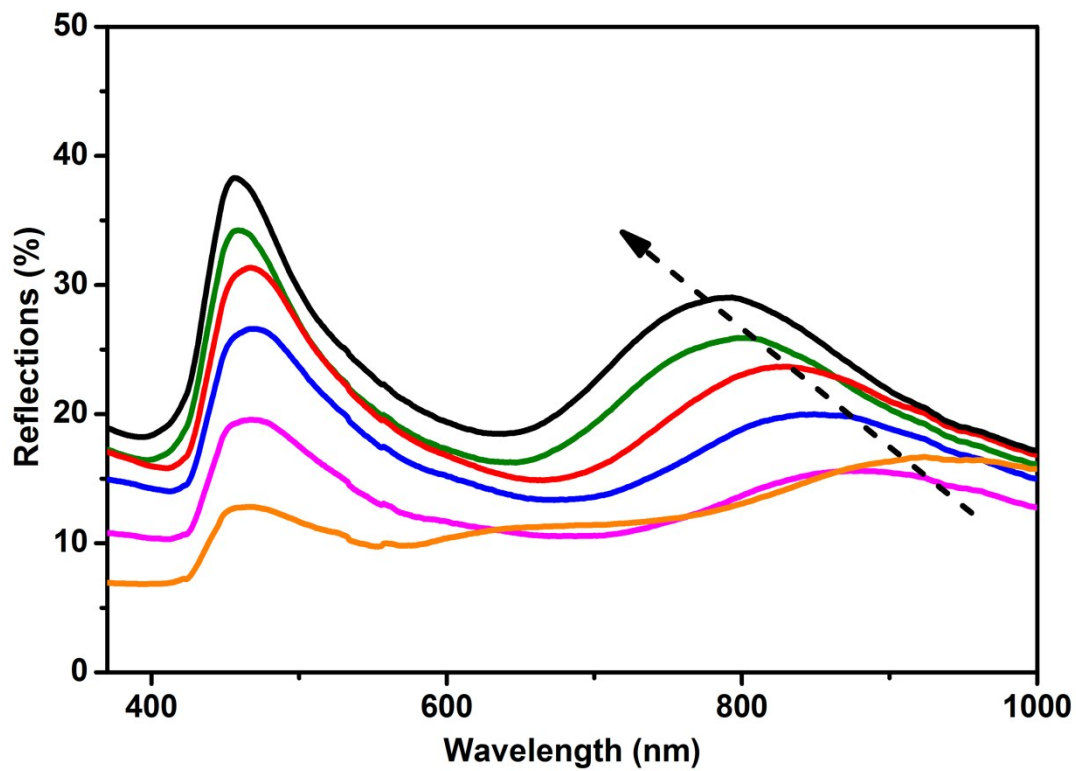

Fig. S6 Reflection spectra of the HMSSs-265/300 PC along with evaporation of iso-butanol.
